# Supplementary material
Source: PubMed Central journal article supplement (PMC6221916)
Supplement: NIHMS994426-supplement-Supplementary_Material.pdf [file NIHMS994426-supplement-Supplementary_Material.pdf]

## Supplementary Material

### **An inducible Alpha-Synuclein expressing neuronal cell line model for Parkinson's disease<sup>#</sup>**

Velmarini Vasquez<sup>1, 2,3,5</sup>, Joy Mitra<sup>1,5</sup>, George Perry<sup>4</sup>, K. S. Rao<sup>2\*</sup> and Muralidhar L. Hegde<sup>1,5,6\*</sup>

*<sup>1</sup>Department of Radiation Oncology, Houston Methodist Research Institute, Houston, Texas 77030, USA. <sup>2</sup>Centre for Neuroscience, Instituto de Investigaciones Científicas y Servicios de Alta Tecnología, City of Knowledge, Republic of Panama. <sup>3</sup>Department of Biotechnology, Acharya Nagarjuna University, Guntur, India. <sup>4</sup>College of Sciences, The University of Texas at San Antonio, <sup>5</sup>Houston Methodist Neurological Institute, Institute of Academic Medicine, Houston Methodist Hospital, <sup>6</sup>Weill Cornell Medical College of Cornell University, New York 10065, USA.*

\*Correspondence to: [mlhegde@houstonmethodist.org](mailto:mlhegde@houstonmethodist.org) or [jrao@indicat.org.pa](mailto:jrao@indicat.org.pa)

Figure S1.

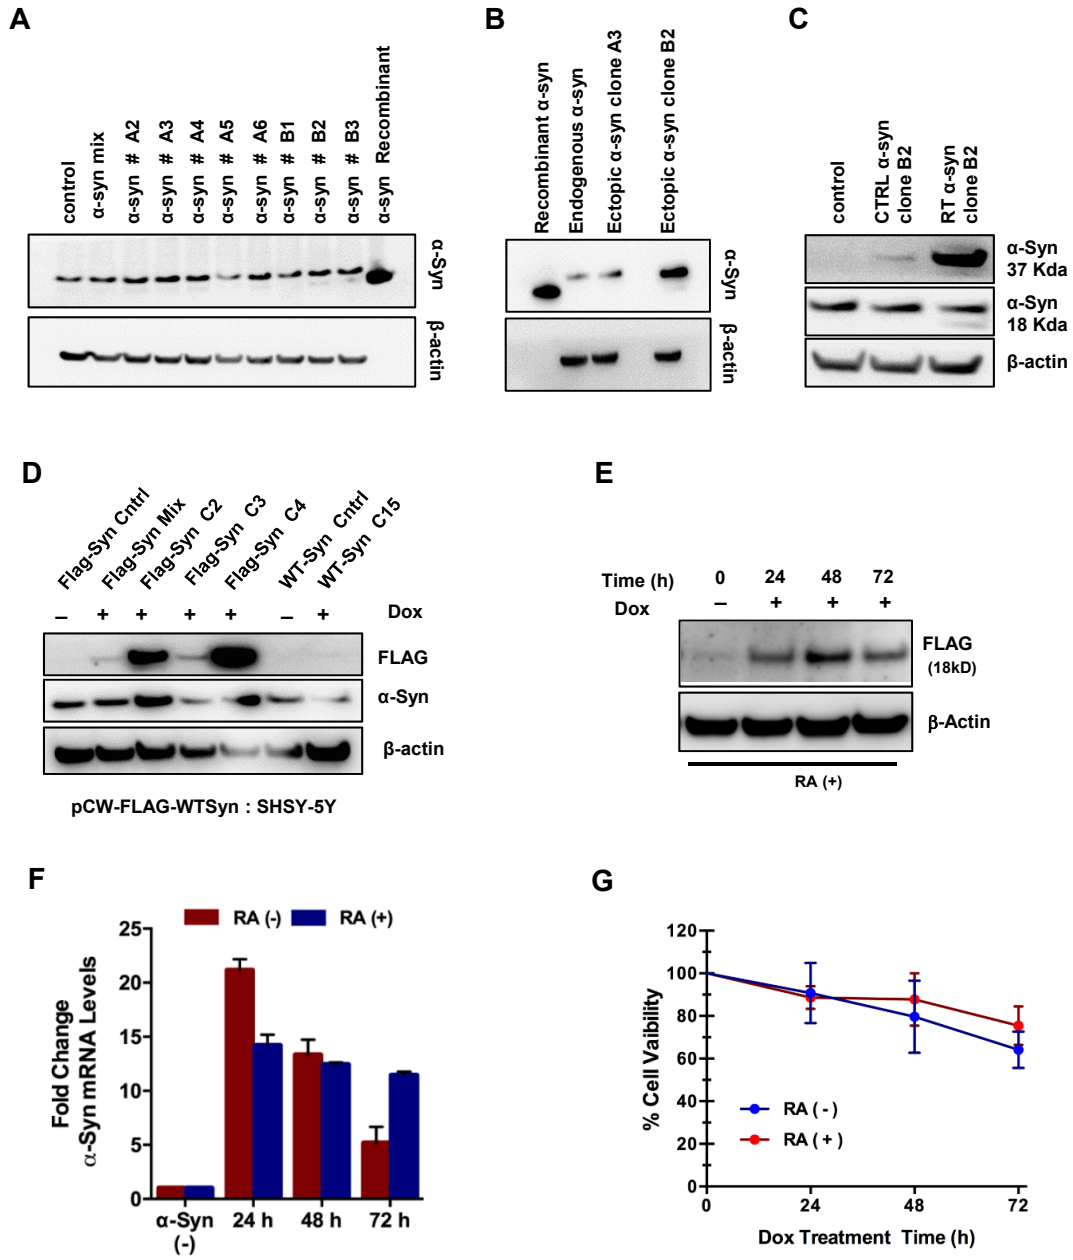

**Supplementary Fig. S1. Constitutive versus inducible  $\alpha$ -synuclein SHSY-5Y Stable line clone selection.**

(A) SHSY-5Y cells were transfected using lipofectamin 2000 reagent. 24 hours after transfection cells were plated on a 96-well plate containing culture medium supplemented with G418 sulphate for selection of stably transfected cells. Resistant cell colonies were selected for expansion and analyzed for  $\alpha$ -synuclein protein expression.  $\alpha$ -Syn A3 and B2 clone were selected. (B) After several passages clone A3 cell line presented reduced  $\alpha$ -Syn expression similar to control protein levels. Clone B2 was selected for further experiments. However, after several passages this line also presented reduced  $\alpha$ -Syn. (C) Transient retransfection (RT) of pCDNA-  $\alpha$ -Syn vector into clone B2 cell line did not increase the levels of monomeric  $\alpha$ -synuclein, but rather of enhance the formation of aggregates at 37kDa. (D) SHSY-5Y cells were transfected using lipofectamin 2000 reagent according to the respective manufacturer's instructions. 24 hours after transfection cells were plated on a 96-well plate containing culture medium supplemented with puromycin for selection of stably transfected cells. Resistant cell colonies were selected for expansion and analyzed for FLAG protein expression. FLAG  $\alpha$ -Syn C4 clone was selected based on stronger expression of ectopic  $\alpha$ -synuclein in comparison to FLAG  $\alpha$ -Syn C2. (E) Immunoblot characterizing time-dependent induction of FLAG  $\alpha$ -synuclein in 7 days differentiated cells. (F)  $\alpha$ -synuclein mRNA abundance quantified by real-time PCR showed a significant time-dependent decreased of  $\alpha$ -synuclein transcript in RA (-) (undifferentiated) cells, whereas RA (+) (differentiated)  $\alpha$ -synuclein transcript reduction was less. (G) Survival rate comparison between undifferentiated RA (-) and differentiated cells RA (+) overexpressing  $\alpha$ -synuclein.
